# Supplementary material for: Global potential of algae-based photobiological hydrogen production
Source: Royal Society of Chemistry journal article supplement (doi:10.1039/d2ee00342b), 2022-01-01
Supplement: d2ee00342b1.pdf [file d2ee00342b1.pdf]

**Table S1.** ECE calculation of combining the light cycle method of 2 min light/3 min dark <sup>1</sup> with the substrate limitation method <sup>2</sup>, which is expected for sustainable bioH<sub>2</sub> production by preventing inactivation of hydrogenases by O<sub>2</sub> and competition by the Calvin cycle, respectively.

| Conditions                                                                                                  |                                            | Production rate or yield                       |
|-------------------------------------------------------------------------------------------------------------|--------------------------------------------|------------------------------------------------|
| Illumination regime <sup>1</sup>                                                                            |                                            | 2 min light/3 min dark                         |
| Medium <sup>2</sup>                                                                                         |                                            | Acetate and carbon free                        |
| Light intensity (I <sub>r</sub> ) <sup>1</sup>                                                              |                                            | 370 μE m <sup>-2</sup> s <sup>-1</sup>         |
| Average rate of bioH <sub>2</sub> production (n <sub>a</sub> ) <sup>1</sup>                                 |                                            | 49 μmol (mg Chl) <sup>-1</sup> h <sup>-1</sup> |
| Alga DW per m <sup>2</sup> (based on 2 g DW per L alga culture & a culture depth of 10 cm) <sup>3</sup>     |                                            | 200 g m <sup>-2</sup>                          |
| Amount of Chl per m <sup>2</sup> (C, at 30 μg ml <sup>-1</sup> , corresponding to ~1.5% of DW) <sup>3</sup> |                                            | 3 g m <sup>-2</sup>                            |
| Calculations                                                                                                | Algorithm                                  | Production rate or yield                       |
| H <sub>2</sub> energy (E <sub>H</sub> , based on E <sub>0</sub> 286 KJ mol <sup>-1</sup> ) <sup>4</sup>     | $E_H = nE_0 = n_a C E_0$                   | 42042 J                                        |
| Light energy (E <sub>L</sub> , based on 1 h of illumination) <sup>3</sup>                                   | $E_L = tE_{L0} = tN_A I_r h c / \lambda$ * | 289546 J                                       |
| ECE (%) <sup>3,4</sup>                                                                                      | $ECE (\%) = 100 E_H / E_L$                 | 14.5 %                                         |

\* N<sub>A</sub> the Avogadro constant 6.02 × 10<sup>23</sup>, h the Planck constant (6.62 × 10<sup>-34</sup>), c the light velocity (3 × 10<sup>8</sup> m/s), λ the light wavelength. For solar energy, 550 nm is used as an average light wavelength.

**Table S2.** Amount of nonarable land needed to supplement 30% of oil consumption for different regions around the world based on replacement by algal bioH<sub>2</sub> with two scenarios of high and low ECE, i.e. 14.1% and 2.5%, respectively.

| Location      |            | Typical bioH <sub>2</sub> production with 14.1% ECE, kg m <sup>-2</sup> yr <sup>-1</sup> | Nonarable land, ha | 30% of transportation fuel consumption, L yr <sup>-1</sup> | BioH <sub>2</sub> required for 30% replacement, kg yr <sup>-1</sup> | BioH <sub>2</sub> production with 14.1% ECE, kg yr <sup>-1</sup> | Nonarable land required, % | BioH <sub>2</sub> production with 2.5% ECE, kg yr <sup>-1</sup> | Nonarable land required, % |
|---------------|------------|------------------------------------------------------------------------------------------|--------------------|------------------------------------------------------------|---------------------------------------------------------------------|------------------------------------------------------------------|----------------------------|-----------------------------------------------------------------|----------------------------|
| Australia     | Learmonth  | 8.2                                                                                      | 2.74E+08           | 1.63E+10                                                   | 4.16E+09                                                            | 2.25E+13                                                         | 0.019                      | 3.98E+12                                                        | 0.104                      |
| China         | Guangzhou  | 4.8                                                                                      | 2.22E+08           | 1.90E+11                                                   | 4.85E+10                                                            | 1.07E+13                                                         | 0.455                      | 1.89E+12                                                        | 2.567                      |
| Colombia      | Magdalena  | 7                                                                                        | 3.80E+08           | 4.43E+09                                                   | 1.13E+09                                                            | 2.66E+13                                                         | 0.004                      | 4.72E+12                                                        | 0.024                      |
| India         | Trivandrum | 6.9                                                                                      | 6.08E+06           | 5.99E+10                                                   | 1.53E+10                                                            | 4.20E+11                                                         | 3.644                      | 7.44E+10                                                        | 20.555                     |
| Japan         | Fukushima  | 4.7                                                                                      | 9.16E+04           | 7.61E+10                                                   | 1.94E+10                                                            | 4.31E+09                                                         | 451.178                    | 7.63E+08                                                        | 2544.645                   |
| Russia        | Poltavka   | 3.9                                                                                      | 2.41E+08           | 5.15E+10                                                   | 1.31E+10                                                            | 9.40E+12                                                         | 0.140                      | 1.67E+12                                                        | 0.789                      |
| United States | Hawaii     | 7.4                                                                                      | 7.03E+07           | 2.86E+11                                                   | 7.30E+10                                                            | 5.20E+12                                                         | 1.403                      | 9.22E+11                                                        | 7.914                      |

## References

1. Y. Milrad, S. Schweitzer, Y. Feldman and I. Yacoby, *Plant Physiology*, 2018, **177**, 918–926.
2. V. Nagy, A. Podmaniczki, A. Vidal-Meireles, R. Tengölics, L. Kovács, G. Rákhely, A. Scoma and S. Z. Tóth, *Biotechnology for Biofuels*, 2018, **11**, 69.
3. S. Z. Tóth and I. Yacoby, *Trends in Biotechnology*, 2019, **37**, 1159-1163.
4. G. Torzillo, A. Scoma, C. Faraloni and L. Giannelli, *Critical Reviews in Biotechnology*, 2015, **35**, 485-496.
